1 **Research Article**

2

3 **Agency rescues competition for credit assignment among**  
4 **predictive cues from adverse learning conditions**

5

6 **Mihwa Kang<sup>2</sup>, Ingrid Reverte<sup>1\*</sup>, Stephen Volz<sup>1</sup>, Keith Kaufman<sup>1†</sup>, Salvatore Fevola<sup>1</sup>,**  
7 **Anna Matarazzo<sup>1</sup>, Fahd H. Alhazmi<sup>2</sup>, Inmaculada Marquez<sup>3</sup>, Mihaela D. Iordanova<sup>4</sup>,**  
8 **Guillem R. Esber<sup>1,2</sup>**

9

10

11 <sup>1</sup>Brooklyn College, City University of New York, Department of Psychology  
12 2900 Bedford Ave, James Hall, 4414, Brooklyn, NY, 11210

13

14 <sup>2</sup>The Graduate Center, City University of New York  
15 365 5<sup>th</sup> Ave, New York, NY, 10016

16

17 <sup>3</sup>Centro de Investigación en Conducta y Cognición Comparada, Universidad de Guadalajara,  
18 Centro Universitario de la Ciénega, Av. Universidad 1115, Col. Lindavista, Ocotlán, Jalisco,  
19 47820, México

20

21 <sup>4</sup>Concordia University, Department of Psychology, CSBN/GRNC  
22 7141 Sherbrooke St. W. Montreal H4B 1R6

23

24 \*Current address: Sapienza University of Rome, Dept. of Physiology and Pharmacology  
25 Piazzale Aldo Moro 5, 00185, Roma, Italia

26

27 †University of Pittsburgh, Center for Neuroscience  
28 E1448 Starzl Biomedical, Science Tower, Pittsburgh, PA, 15261

29

30

31 Authors MK and IR contributed equally to this work.

32

33

34

35 **Keywords:** agency; credit assignment; cue competition; reinforcement learning

36

37 Corresponding author: Guillem R. Esber ([GESber@brooklyn.cuny.edu](mailto:GESber@brooklyn.cuny.edu))

38

39 **Abstract**

40 A fundamental assumption of learning theories is that the credit assigned to predictive  
41 cues is not simply determined by their probability of reinforcement, but by their ability to  
42 compete with other cues present during learning. This assumption has guided behavioral  
43 and neural science research for decades, and tremendous empirical and theoretical  
44 advances have been made identifying the mechanisms of cue competition. However,  
45 when learning conditions are not optimal (e.g., when training is massed), credit  
46 assignment is no longer competitive. This is a catastrophic failure of the learning system  
47 that exposes the individual's vulnerability to form spurious associations in the real world.  
48 Here, we uncover that cue competition can be rescued when conditions are suboptimal  
49 provided that the individual has agency over the learning experience. Our findings reveal  
50 a new connection between agency over learning and credit assignment to cues, and open  
51 new avenues of investigation into the underlying mechanisms.

52

53

54

55

56

57

58

59

60

61

62

63 The ability to predict outcomes of biological significance is essential to fitness and  
64 survival. To do so, animals, including humans, must identify which stimuli among the  
65 many present provide relevant predictive information (Mackintosh, 1974; Dickinson,  
66 1980); that is, they must solve the problem of structural credit assignment (Sutton & Barto,  
67 2018). A dramatic example of this type of problem is provided by the COVID-19 pandemic,  
68 as societies around the world scrambled to ascertain which stimuli posed a risk of  
69 contagion and which did not. Failure to assign predictive credit to relevant stimuli (e.g.,  
70 close physical contact with other individuals, shared meals, enclosed spaces) has led to  
71 dire consequences (e.g., Fisher et al., 2020), while misassigning credit to irrelevant stimuli  
72 (e.g., 5G mobile networks, mosquitoes, bleach) has likewise fostered maladaptive  
73 behaviors (Nowak et al., 2020; Krause et al., 2020). Given the intimate relationship  
74 between credit assignment and decision making, it is essential to elucidate how credit is  
75 apportioned among cues under various learning conditions.

76 Credit assignment is widely regarded as a competitive process in which the best  
77 predictor of the outcome acquires substantial credit over the course of learning at the  
78 expense of other predictors (e.g., Honey et al., 2020; Sutton & Barto, 1990; Delamater,  
79 2012; Harris, 2006; Wagner 2003; McLaren & Mackintosh, 2000; Brandon et al., 2000;  
80 Pearce, 1994; Miller & Matzel, 1988; Wagner, 1981; Pearce & Hall, 1980; Mackintosh,  
81 1975; Rescorla & Wagner, 1972). In support of this notion is evidence that cues compete  
82 for credit in a range of tasks (Kamin, 1968; Pavlov, 1927, Wagner et al., 1968, Rescorla,  
83 1968, 1970) and species, from *C. elegans* to humans (Merritt et al., 2019, Prados et al.,  
84 2013, Blaser et al., 2006, Pearce et al., 2012, Kamin, 1968, Wagner et al., 1968,  
85 Beauchamp et al., 1991, Tobler et al., 2006; Dickinson et al., 1984). However, it has also

86 long been known that cue competition is not ubiquitous (e.g., Durlach & Rescorla, 1980;  
87 Batsell & Batson, 1999; Vadillo & Matute, 2010; Maes et al., 2016) and can be disrupted  
88 across multiple learning conditions (reviewed in: Urcelay, 2017; Witnauer et al., 2014;  
89 Wheeler & Miller, 2008). One such condition is experiencing the trials in massed fashion  
90 (rats: Stout et al., 2003; Sissons & Miller, 2009; pigeons (Packheiser et al., 2020); humans  
91 (Beesley & Shanks, 2012). This finding has profound implications because in our ever-  
92 complex world we are routinely bombarded with information presented in close  
93 succession. Diminished cue competition in such situations implies that incidental stimuli  
94 may hijack the learning system and wrongfully gain control over behavior.

95         Recently, Reverte et al. (2020) reported that granting rats agency over trial  
96 presentations protects cue-reward learning from the well-known deleterious effects of  
97 massed training (e.g., Lattal, 1999; Barela, 1999; Holland, 2000; Sunsay & Bouton, 2008).  
98 Here, we sought to determine whether agency over learning could specifically rescue  
99 competitive credit assignment under massed trial conditions. To this end, we embedded  
100 a trial self-initiating procedure within a powerful master-yoked design that allowed us to  
101 vary the degree of agency over learning while keeping the exposure to cue-reward  
102 relationships identical (Reverte et al., 2020). Using a variety of well-established and novel  
103 cue competition tasks, we found robust evidence of cue competition only in animals that  
104 enjoyed agency over learning. Importantly, this effect was not the consequence of  
105 differential levels of engagement, general discrimination ability or propensity to process  
106 compounded stimuli concurrently. Our data provide the first demonstration of a critical  
107 role for agency in credit assignment and open up new lines of neural and theoretical  
108 inquiry.

109  
110  
111  
112  
113  
114  
115  
116  
117  
118  
119  
120  
121  
122  
123  
124  
125  
126  
127  
128  
129  
130

## Results

### **Agency rescues the blocking effect from the deleterious effects of massed training**

We first set out to test whether agency over learning rescues the blocking effect (Kamin, 1968) from the deleterious effects of massed training in (Fig. 1B). This and the remainder of the studies employed a within-subject design embedded within a between-subject master-yoked procedure (Fig. 1A). Master rats (Group Agency) were allowed to self-initiate their trials by performing a nose poke into a nose port at any point during a period of trial availability (max = 20 s) signaled by a nose port light (Reverte et al., 2020). On any given trial, a nose poke would turn on one or more 10-s cues of the visual and auditory modality. In contrast, yoked rats (Group Passive) received an identical sequence of events to their master counterparts (including the trial availability cue), but trial presentations were noncontingent on their behavior (i.e., standard Pavlovian conditioning).

In both groups, a sucrose reward delivered in a dipper cup was made available on reinforced trials immediately after the termination of the cues. Conditioned responding was measured as the number of anticipatory head entries made by the rat at the dipper recess during the last 5 s of cue presentation (Holland 1977; see Materials & Methods). Critically, the ITI was programmed to be only 10 s on average (range: 5-15 s). Since Agency rats could forgo trial offers, the mean ITI was effectively longer (see Materials & Methods), but still considerably shorter than the mean ITI typically used in studies of conditioned magazine approach featuring 10-s cues (in the order of minutes).

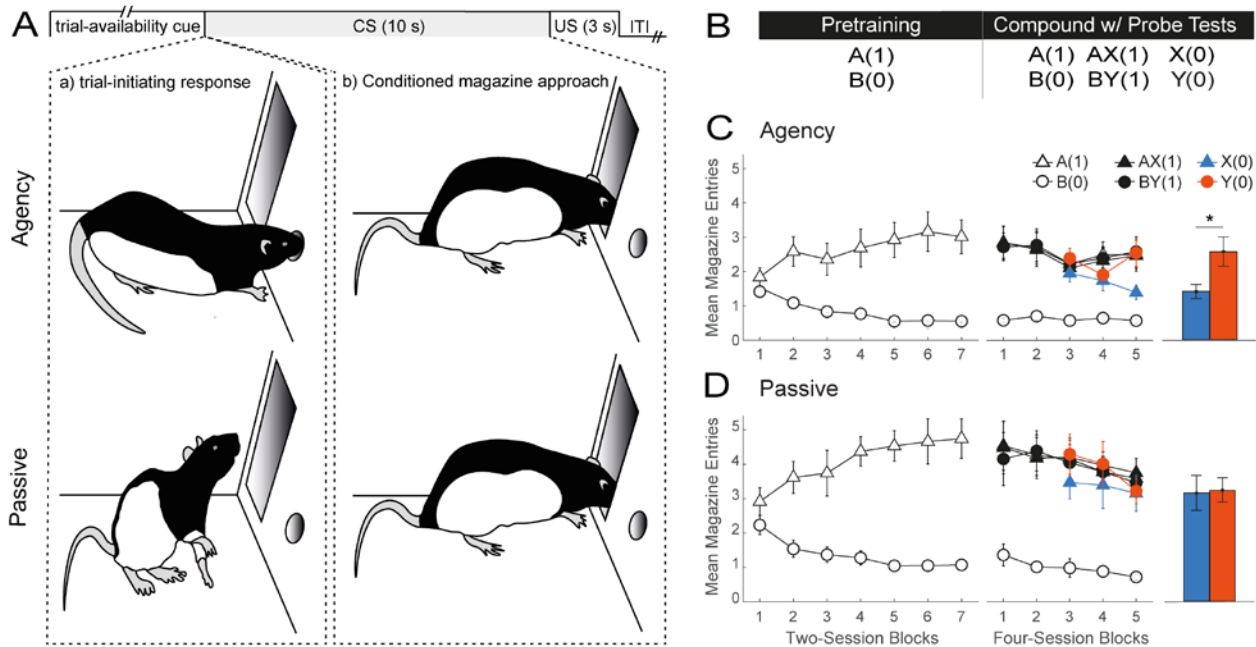

**Figure 1.** Agency over learning rescues competitive credit assignment from the deleterious effects of massed training in a blocking task. **(A)** Trial structure in this and the remainder of the studies. On each trial offer, a nose port light was presented in both groups signaling trial availability to Agency rats. A trial-initiating response (nose poke) by an Agency rat immediately resulted in a 10-s cue being presented to that rat as well as to its yoked animal in the Passive group. On reinforced trials, a sucrose US was presented at dipper magazine following cue offset. Trial offers were separated by a 10-s variable intertrial interval (ITI). **(B)** Experimental design. Letters A and B denote visual stimuli, whereas X and Y denote auditory stimuli. Digits in brackets represent the probability of reward for each trial type. The pretraining phase involved a simple discrimination between A and B. During the compound phase, these trials were interleaved with compounds AX (where A should block X) and BY (where B should not block Y), both continuously reinforced. To test for blocking (i.e., less responding to X than Y), two daily probe trials with X and Y were introduced on session 9 of the Compound phase. **(C)** and **(D)** Behavioral results in groups Agency and Passive, respectively. The left and center line plots depict performance during the Pretraining and Compound phases, respectively. The bar graphs on the right show average responding to X and Y on probe trials across the last four sessions. Conditioned responding is measured as mean number of head entries (+/- SEM).

131

132 Both groups underwent two phases of training. In the first phase, rats were pretrained

133 with a simple discrimination involving two visual cues, A and B. Cue A, which would serve

134 as the blocking stimulus in the following phase, was reinforced with a probability of 1

135 [henceforward symbolized by A(1)], while B was never reinforced [B(0)]. Training

136 continued for 14 days to allow the opportunity for asymptotic discrimination learning (Fig.

137 1, Panels C and D, left). A mixed ANOVA revealed a significant main effect of cue ( $F_{(1,182)}$

138 = 398.24,  $p < 0.001$ ) and group ( $F_{(1,14)} = 8.10$ ,  $p = 0.013$ ), and a group by cue interaction

139 ( $F_{(1,182)} = 15.65, p < 0.001$ ). Post-hoc analyses revealed that this interaction was likely  
140 driven by the slightly higher level of responding on A(1) trials in the Passive group ( $t_{(17.1)}$   
141  $= -3.95, p = 0.006$ ), as both groups significantly discriminated between A(1) and B(0)  
142 (Agency:  $t_{(182)} = 11.31, p < 0.001$ ; Passive:  $t_{(182)} = 16.91, p < 0.001$ ).

143 In the second, compound phase (Fig. 1, Panels C and D, center), training with  
144 A(1), B(0) continued for another 20 sessions, but, in addition, two novel auditory cues, X  
145 and Y, were presented in compound with A and B on separate, reinforced trials.  
146 Specifically, X accompanied A as the stimulus to be blocked, whereas Y accompanied B  
147 as the control cue for blocking [AX(1), BY(1)]. Panels C and D (center) of Fig. 1 show that  
148 in both groups the compounds evoked similar levels of conditioned responding as A. A  
149 mixed ANOVA revealed a main effect of cue ( $F_{(3,266)} = 187.35, p < 0.001$ ), session block  
150 ( $F_{(4,266)} = 4.28, p = 0.0002$ ) and group ( $F_{(1,14)} = 7.07, p < 0.019$ ), and a group by cue  
151 interaction ( $F_{(3,266)} = 10.33, p < 0.001$ ). Post hoc analyses revealed no significant between-  
152 group differences for any of the trial types, indicating that, once again, the interaction was  
153 likely driven by the higher asymptote of responding in the Passive group on reinforced  
154 trials.

155 In order to monitor the emergence of blocking (i.e., less responding to X than Y),  
156 two probe trials with each of X and Y were randomly interleaved daily from session 9  
157 onward (Fig. 1, panels C and D, center). Inspection of the results suggests that a blocking  
158 effect emerged at the end of the compound phase in the Agency, but not the Passive  
159 group. This impression was confirmed by a mixed ANOVA that focused on the mean  
160 responding to X and Y across the last four probe sessions (Fig. 1, panels C and D, right).  
161 This analysis revealed significant main effects of cue ( $F_{(1, 98)} = 7.80, p = 0.006$ ) and group

162 ( $F_{(1, 14)} = 6.42, p = 0.024$ ), and a significant group by cue interaction ( $F_{(1,98)} = 6.28, p =$   
163  $0.014$ ). Exploration of this interaction with simple main effects confirmed a significant  
164 difference in responding to the cues (i.e., an intermixed blocking effect) in the Agency  
165 ( $t_{(98)} = 3.75, p = 0.002$ ), but not the Passive group ( $t_{(98)} = 0.20, p = \sim 1$ ). The results thus  
166 provide evidence that agency over learning rescues competitive credit assignment from  
167 the adverse effects of massed trials.

168

### 169 **Agency rescues competitive credit assignment in a novel cue competition task**

170 To further examine the influence of agency on competitive credit assignment under  
171 massed trials, we next compared the performance of Agency and Passive groups in a  
172 novel cue competition design. This design creates a conflict between the expected pattern  
173 of responding to two cues, X and Y, when credit assignment is competitive relative to  
174 when it is noncompetitive. By creating this conflict, this design maximizes the chances of  
175 detecting differences between competitive and noncompetitive learning. This makes this  
176 design ideally suited for examining the full impact of behavioral and neural manipulations  
177 on credit assignment. Given the novelty of the design, we began by piloting it in a standard  
178 Pavlovian magazine-approach setting with spaced trials (Supplementary Materials, Exp.  
179 S1).

180 The details of the experimental design are shown in the table of Fig. 2A. Two  
181 groups were trained with the same master-yoked procedure used in the previous study  
182 (Fig. 1A). In the pretraining phase (Fig. 2, panels B and C, left), rats received 10 sessions  
183 of discrimination training with two visual cues, A(1) and B(0), and two auditory cues,  
184 X(.75) and Y(.25) where, once again, the numbers in parenthesis represent the probability



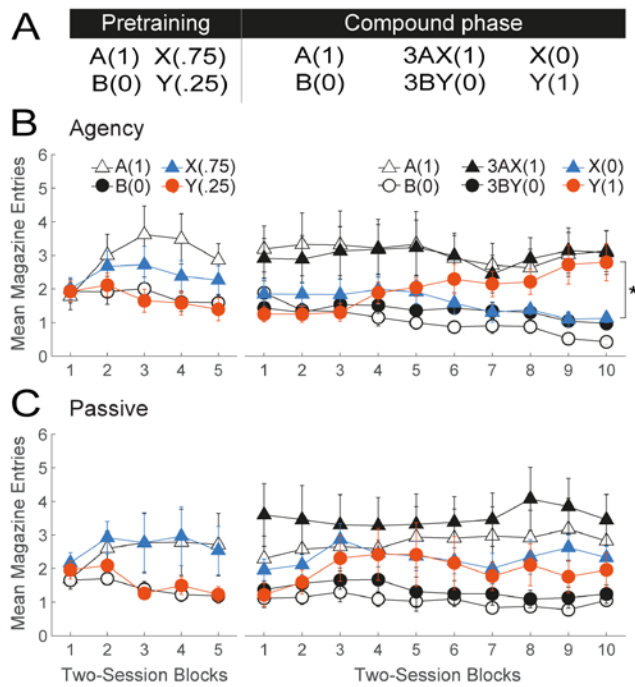

**Figure 2.** Agency over learning rescues competitive credit assignment from the deleterious effects of massed training in a novel cue-competition task. **(A)** Experimental design. The coefficient 3 denotes three times as many presentations of the AX(1) and BY(0) compounds as of the rest of trial types. During the Pretraining phase, all rats received discrimination training between A and B and X and Y. In the Compound phase, these stimuli continued to be presented with the same probability of reward. However, X was presented in compound with A on the 75% of trials in which it was rewarded (allowing A to take away its credit), whereas Y was presented in compound with B on the 75% of trials in which it was not rewarded (allowing B to take the blame for reward omission). Trials with X(0) and Y(1) permitted continual monitoring of the predictive status of these stimuli as the discrimination developed. **(B)** and **(C)** Behavioral results in groups Agency and Passive, respectively. The left and right line plots depict performance during the Pretraining and Compound phases, respectively. Conditioned responding is represented as mean number of magazine head entries (+/-SEM).

185 of reward associated with each cue. A mixed ANOVA revealed a main effect of cue ( $F_{(3,266)}$   
 186 = 24.27,  $p < 0.001$ ) and a cue by session block interaction ( $F_{(12,266)} = 2.03$ ,  $p = 0.022$ ).  
 187 Post-hoc analysis of this interaction revealed that the discrimination between A(1) and  
 188 B(0) was solved from session block 3 onward ( $t_{(266)} = [3.78 - 4.64]$ ,  $p < 0.037$ ). Post hoc  
 189 analysis of the main effect of cue revealed that, overall, responding to X(.75) was higher  
 190 than to Y(.25) ( $t_{(266)} = 5.25$ ,  $p < 0.001$ ). No effect of group nor any interaction involving  
 191 that factor was found.

192 In the second, compound phase, cues X and Y had the same probability of reward,  
 193 but were subject to opposing competing forces (Fig. 2, Panels B and C, right). Specifically,  
 194 X was presented in compound with A on the 75% of trials in which it was followed by  
 195 reward [3AX(1), X(0); where 3 indicates the proportion of trials]. This allowed A to  
 196 compete with X as a predictor of reward and *steal* its credit (e.g., Wagner, 1969). A's  
 197 ability to serve as a competitor was further bolstered by continuing to present it by itself

198 followed by reward [A(1)]. In addition, cue Y was presented in compound with B on the  
199 25% of trials in which Y was not reinforced [3BY(0), Y(1)], allowing B to compete with Y  
200 for predicting reward omission. Casually put, this training was intended to ensure that B  
201 rather than Y would *take the blame* for the omission of reward on 3BY(0) trials  
202 (Chorazyna, 1962; Rescorla, 2003). Throughout this phase, B(0) trials continued to be  
203 presented.

204 A key advantage of this design is that X(0) and Y(1) trials permit online monitoring  
205 of the impact of competition on responding to these cues. If credit assignment is  
206 noncompetitive (e.g., Bush & Mosteller, 1951), X should be expected to evoke more  
207 responding than Y given its higher probability of reward. Conversely, to the extent credit  
208 assignment is competitive, Y should be expected to evoke more responding than X  
209 (Wagner et al., 1968; Wagner, 1969). To examine the role of agency, we focused our  
210 analysis on responding on X(0) and Y(1) trials. Inspection of Fig. 2 (Panels B & C, right)  
211 suggests that cue competition prevailed in the Agency, but not the Passive group. This  
212 impression was confirmed by a mixed ANOVA, which revealed significant group by cue  
213 ( $F_{(1, 266)} = 14.69, p < 0.001$ ), cue by session block ( $F_{(9, 266)} = 2.19, p < 0.001$ ), and group  
214 by cue by session block interactions ( $F_{(9, 266)}=2.16, p=0.025$ ). A post-hoc analysis of the  
215 three-way interaction revealed that, consistent with competitive credit assignment, rats in  
216 the Agency group responded to Y significantly more than to X on session blocks 9 ( $t_{(266)}$   
217 = 3.69,  $p < 0.002$ ) and 10 ( $t_{(266)}=3.78, p < 0.002$ ). In contrast, in the Passive group, the  
218 difference between X and Y was marginally significant only on session block 9, but in the  
219 opposite, noncompetitive direction ( $X > Y$ ) ( $t_{(266)} = 1.97, p = 0.05$ ).

220 A mixed ANOVA on responding to the remainder of the cues in the compound  
221 phase revealed a significant main effect of cue ( $F_{(3,546)} = 138.82, p < 0.001$ ) and a group  
222 by cue interaction ( $F_{(3,546)} = 3.23, p = 0.022$ ). Post-hoc analyses, however, confirmed that  
223 that both groups discriminated between A(1) and B(0) [Agency:  $t_{(546)} = 10.81, p < 0.001$ ;  
224 Passive:  $t_{(546)} = 9.26, p < 0.001$ ] as well as between 3AX(1) and 3BY(0) trials [Agency:  
225  $t_{(546)} = 8.79, p < 0.001$ ; Passive:  $t_{(546)} = 11.42, p < 0.001$ ]. A likely contributor to this  
226 interaction was the greater responding observed on 3AX(1) than A(1) trials in the Passive  
227 ( $t_{(546)} = -3.86, p = 0.004$ ), but not the Agency ( $t_{(546)} = 0.47, p = 1$ ) group. This difference  
228 can be explained by the fact that X undergoes limited competition by A in the Passive  
229 group, allowing the two cues to sum their predictive credits when presented in compound.

230 This study thus provides further evidence of a profound impairment in cue  
231 competition under massed Pavlovian training, rendering the rescuing effects of agency  
232 over learning the more striking. One interpretation, however, is that Agency rats did not  
233 apportion credit any more competitively than Passive rats, but instead treated cues X and  
234 Y as radically distinct when presented alone vs. in compound. In other words, Agency,  
235 but not Passive rats may have treated the compounds AX and BY as independent  
236 *configural* stimuli distinct from their constituent elements. To rule out this interpretation,  
237 we used a variant of the above design that does not afford an explicit configural solution.

238

239 **Agency rescues competitive credit assignment in the absence of an explicit**  
240 **configural solution**

241 Fig. 3A shows the experimental design. In the pretraining phase, all rats received 8  
242 sessions with a simple visual discrimination of the form A(1), B(0) (Fig. 3, panels B and

243 C, left). Both groups solved this discrimination as evidenced by greater magazine-  
244 approach responding on A(1) than B(0) trials over the course of training (main effect of  
245 cue:  $F_{(1,98)} = 88.72$ ,  $p < 0.001$ ; cue by session block interaction: ( $F_{(1,98)} = 5.32$ ,  $p < 0.002$ ).  
246 No significant effects of group or interactions involving that factor were found.

247 In the second, compound phase, all rats continued to receive the A(1), B(0)  
248 discrimination, but novel compound trials AX(.75) and BY(.25) were introduced, where X  
249 and Y were again auditory stimuli (Fig. 3, panels B and C, right). A mixed ANOVA on  
250 responding to A(1), B(0), AX(.75) and BY(.25) trials throughout this phase revealed a  
251 significant effect of cue [ $F_{(3,434)} = 142.33$ ,  $p < 0.001$ ] and a group by cue interaction [ $F_{(3,434)}$   
252  $= 7.88$ ,  $p < 0.001$ ]. Post-hoc analyses of this interaction revealed that both groups solved  
253 the A(1) vs. B(0) [Agency:  $t_{(434)} = 10.94$ ,  $p < 0.001$ ; Passive:  $t_{(434)} = 13.28$ ,  $p < 0.001$ ] as  
254 well as the AX(.75) vs. BY(.25) [Agency:  $t_{(434)} = 4.36$ ,  $p < 0.001$ ; Passive:  $t_{(434)} = 9.96$ ,  $p <$   
255  $0.001$ ] discriminations. A likely contributor to the group by this interaction is the fact that  
256 Agency rats discriminated better between BY(.25) and B(0) trials [ $t_{(434)} = -7.21$ ,  $p < 0.001$ ,  
257 Cohen's  $d = 0.79$ ] than Passive rats [ $t_{(434)} = -3.30$ ,  $p = 0.029$ , Cohen's  $d = 0.53$ ]. This  
258 suggests that cue B was better able to protect Y from extinction in Agency but not Passive  
259 rats, consistent with the notion that competition was impaired in the latter.

260 Note that, in the absence of competitive credit assignment, this training should  
261 result in X evoking more responding than Y given their respective probabilities of reward  
262 (0.75 and 0.25). On the other hand, if credit assignment is competitive, more responding  
263 to Y than X should be observed. This is because nonreinforced AX trials should turn X  
264 into a signal for the occasional omission of reward (a conditioned inhibitor), while the  
265 presence of B on nonreinforced BY trials should protect Y from extinction. To test this, we

266 randomly interspersed two daily nonreinforced probe trials with X and Y [X(0), Y(0)]  
 267 starting on session 13 (Fig. 3, panels B and C, right). A mixed ANOVA on responding  
 268 during the probe trials revealed a marginally significant effect of cue ( $F_{(1,126)} = 3.86$ ,  $p <$   
 269  $0.052$ ) and a significant group by cue interaction ( $F_{(1,126)} = 5.43$ ,  $p < 0.021$ ). Post-hoc  
 270 analysis of this interaction confirmed that the Agency group responded significantly more  
 271 to Y than X ( $t_{(126)} = -3.04$ ,  $p = 0.017$ ). In contrast, the Passive group responded equally to  
 272 both cues ( $t_{(126)} = 0.26$ ,  $p = 1$ ), as expected if cue competition was disrupted. The results  
 273 thus provide further evidence that agency over learning rescues competitive credit  
 274 assignment.  
 275

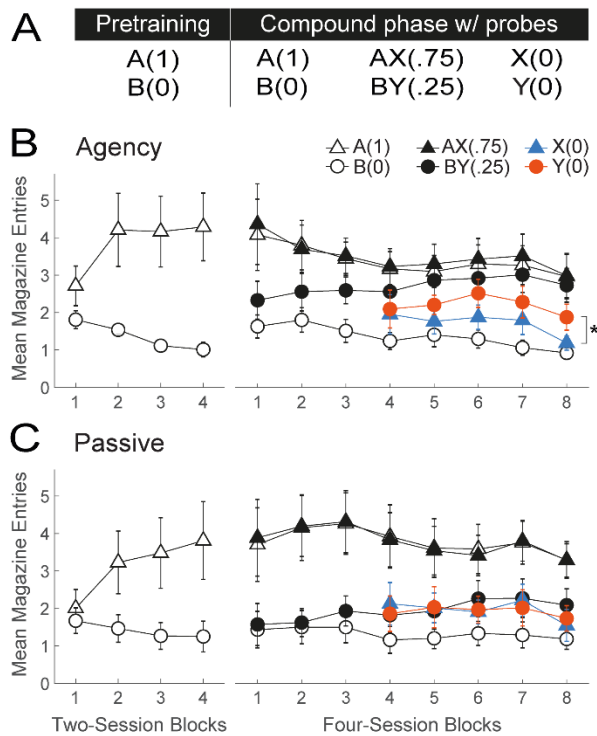

**Figure 3.** Agency over learning rescues competitive credit assignment under massed training conditions in the absence of an explicit configural solution. **(A)** Experimental design. The pretraining phase involved a simple discrimination between A(1) and B(0). During the compound phase, these trials continued to be presented, but were interleaved with AX(.75) and BY(.25) trials. Note that X has a higher probability of reward than Y. However, X signals a net decrement in the probability of reward when considered against the backdrop of A, whereas Y signals a net increase in the probability of reward when considered against the backdrop of Y. Thus, to the extent credit assignment is competitive, Y should evoke more responding than X, but the opposite should be true if credit assignment is noncompetitive. To test this, two daily probe trials with X and Y were interleaved with training trials, starting on session 13 of the Compound phase. **(B)** and **(C)** Behavioral results in groups Agency and Passive, respectively. The left and right line plots depict performance during the Pretraining and Compound phases, respectively. Conditioned responding is represented as mean number of magazine head entries (+/-SEM).

276

277

## 278 **Ruling out alternatives for the role of agency in competitive credit assignment**

279 The results so far can be readily interpreted by assuming that agency over learning  
280 enhances the animals' attention to task, discriminating proficiency, or ability to process  
281 compounded stimuli concurrently. To test these interpretations, we compared  
282 performance between Agency and Passive rats in a patterning task in which opposite  
283 credit must be assigned to compound cues and their constituent elements (Fig. 4A). One  
284 such problem was a negative-patterning discrimination in which two cues, a visual (A)  
285 and an auditory (X) stimulus, were rewarded when presented individually, but not in  
286 compound [A(1), X(1), AX(0)]. A second problem involved a positive-patterning  
287 discrimination in which another pair of visual (B) and auditory stimuli (Y) were rewarded  
288 when presented in compound, but not individually [B(0), Y(0), BY(1)]. If any of the  
289 aforementioned interpretations is correct, Passive animals should find this discrimination  
290 particularly difficult.

291 Although both discriminations were trained concurrently, for simplicity's sake we  
292 treated them separately when displaying and analyzing the data (Fig. 4, Panels B and C).  
293 To further simplify the analysis, we averaged responding on elemental trials [mean of A(1)  
294 and X(1) trials and of B(0) and Y(0) trials]. Inspection of the data suggests that Passive  
295 animals solved both patterning problems at least as well as Agency rats. A mixed ANOVA  
296 on the negative-patterning discrimination revealed a main effect of group [ $F_{(1,378)} = 91.60$ ,  
297  $p < 0.001$ ] and significant session block by cue [ $F_{(13,378)} = 5.11$ ,  $p < 0.001$ ] and group by  
298 cue [ $F_{(1,378)} = 33.48$ ,  $p < 0.001$ ] interactions. Simple main effects analysis of the latter  
299 interaction confirmed that both Agency [ $t_{(378)} = -2.68$ ,  $p = 0.016$ ] and Passive [ $t_{(378)} = -$   
300  $10.86$ ,  $p < 0.002$ ] animals solved the A(1)/X(1) vs. AX(0) discrimination, although the

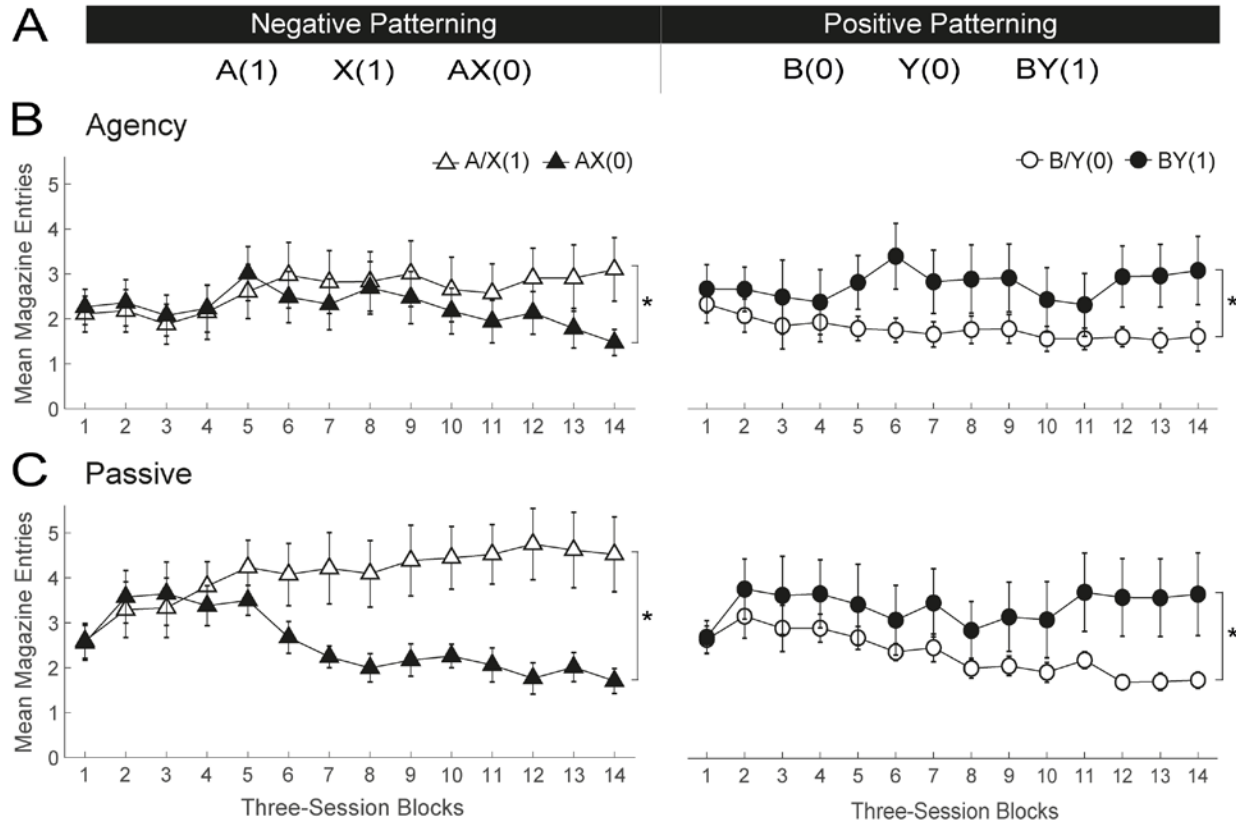

**Figure 4.** Passive rats perform no worse than Agency rats in a patterning task, suggesting spared compound processing and general discrimination ability. **(A)** Experimental design. A negative- and positive-patterning discrimination involving two visual stimuli (A and B) and two auditory stimuli (X and Y) were trained contemporaneously. **(B)** and **(C)** Behavioral results in groups Agency and Passive, respectively. The left and right panels show discrimination performance in the negative- and positive-patterning discriminations, respectively. Note that, for each discrimination, responding has been averaged across elemental trials [e.g., A/X(1) denotes mean responding on A(1) and X(1) trials]. Conditioned responding is measured as the mean number of magazine head entries (+/-SEM).

301 effect size was larger in Passive than Agency rats (Cohen's  $d = 0.93$  and  $0.23$ ,  
 302 respectively). A parallel mixed ANOVA of the positive-patterning discrimination revealed  
 303 only a significant effect of cue [ $F_{(1,378)} = 106.56, p < 0.001$ ], indicating that both groups  
 304 solved the B(0)/Y(0) vs. BY(1) discriminations similarly (Agency: Cohen's  $d = 0.65$ ;  
 305 Passive: Cohen's  $d = 0.68$ ). Taken together, these findings suggest that the deficits in  
 306 competitive credit assignment previously observed in Passive rats were unlikely due to

307 an inferior level of engagement, ability to solve complex discriminations, process  
308 compounded stimuli concurrently, or form configural representations.

309 To buttress these conclusions, we also presented this patterning problem to the  
310 rats from the first study at the end of blocking training (Supplementary Materials, Exp.  
311 S2). Since those rats had already experienced the two auditory stimuli as X and Y, two  
312 novel auditory stimuli were used. The results of this replication confirmed those with naïve  
313 animals. That is, the same Passive rats that exhibited deficits in blocking were at least as  
314 capable of solving complex nonlinear discriminations as their Agency counterparts.

315

316

### **General Discussion**

317 Competitive credit assignment is the backbone of models of associative and  
318 reinforcement learning, to the point that an inability to account for competitive learning  
319 phenomena renders a model obsolete and useless (e.g. Ludvig et al., 2012; Miller et al.,  
320 1995). Yet converging evidence indicates that competition is not automatically determined  
321 by the presence of other cues, but also by learning conditions such as trial spacing  
322 (reviewed in: Urcelay, 2017; Witnauer et al., 2014; Wheeler & Miller, 2008). Specifically,  
323 when information is presented in a massed fashion, cue competition is diminished (Stout  
324 et al., 2003; Sissons & Miller, 2009; Packheiser et al., 2020; Beesley & Shanks, 2012).  
325 Here, we provide evidence that the presence of agency over the learning experience can  
326 rescue competitive credit assignment from the detrimental effects of massed training. This  
327 evidence speaks to the necessity of incorporating agency into current theories of learning.

328 Taken together, our data allow us to rule out various trivial explanations for the  
329 effects observed. Firstly, the beneficial effects of agency on competitive credit assignment



330 are not simply the product of a heightened ability to process compounded stimuli  
331 concurrently or learn complex discriminations. Evidence for this comes from the superior  
332 performance of Passive groups in the patterning task. Secondly, neither can the  
333 contribution of background (contextual) cues to competitive learning explain our full  
334 pattern of results. While contextual conditioning could summate with responding to the  
335 target cues (Urcelay & Miller, 2014) and mask any differences when responding is at  
336 ceiling (e.g., Passive group in blocking study), such masking would not occur when  
337 responding is below asymptote (e.g., in novel cue-competition task studies). Thirdly, our  
338 data are likewise difficult to explain by a differential role of eligibility traces in Agency and  
339 Passive groups (Sutton, 1988; Sutton & Barto, 2018). Specifically, in Passive animals,  
340 massed training might allow eligibility traces of recently presented cues to spill over the  
341 subsequent trial and contaminate credit assignment. This effect would be weaker in  
342 Agency rats if trial-initiating responses serve to precipitate the decay of eligibility traces,  
343 essentially fulfilling the role of a long ITI. The issue with this hypothesis is that it also  
344 predicts poorer performance for Passive rats in the patterning task, which our data  
345 disconfirmed.

346       The effects observed can be explained by assuming that agency over learning  
347 modulates the computation of prediction errors (PEs; i.e., the difference between actual  
348 and expected outcome). The standard assumption in models of associative and  
349 reinforcement learning is that PEs are computed by summing across the outcome  
350 expectancies generated by each of the cues present (Rescorla & Wagner, 1972; Sutton  
351 & Barto, 1990; Siegel & Allan, 1996; Sutton & Barto, 2018; Honey et al., 2020). This  
352 aggregate expectancy is then compared with the actual outcome experienced, and the

353 difference determines the size and sign of the credit update (i.e., learning). An aggregate  
354 PE implies that all cues present share a common engine of learning which ensures that  
355 they compete over a common pool of available credit. Our data suggest that, in the  
356 absence of agency, massed training might interfere with the computation of aggregate  
357 PEs and render learning less competitive. This might explain why the patterning task was  
358 solved more readily by Passive rats, as cue competition can hinder the solution of  
359 nonlinear discriminations (e.g., Byrom & Murphy, 2018). Given the central role of PEs in  
360 learning (e.g., Schmajuk, 2010; Sutton & Barto, 2018), cognition (e.g., de Bruin & Michael,  
361 2017; den Ouden & de Lange, 2012), psychopathology (e.g., Krawczyk et al., 2017; Zald  
362 & Treadway, 2017; Gradin et al., 2011) and neuroscience (e.g., Diederer & Fletcher,  
363 2020; Watabe-Uchida et al., 2017; Ohmae & Medina, 2015; Roesch et al., 2012; Niv &  
364 Schoenbaum, 2008; Waelti et al., 2001), further examination of its interaction with agency  
365 would be of fundamental importance.

366       Importantly, agency over learning might regulate other mechanism besides PE; for  
367 instance, by modulating the allocation of attention to cues (e.g., Mackintosh, 1975; Pearce  
368 & Hall, 1980; Krushke, 2001; Le Pelley, 2004; Esber & Haselgrove, 2011; George &  
369 Pearce, 2012). According to a classical selective attention account (Mackintosh, 1975),  
370 cue competition results from paying increasingly more attention to the best predictor while  
371 devoting increasingly less attention to relatively poor predictors. This attentional  
372 divergence ensures that the most reliable cue acquires substantial credit and controls  
373 behavior while limiting the ability of unreliable cues to do so. Agency over learning might  
374 thus protect the attentional mechanism underlying the divergence from detrimental effects  
375 of massed training. Alternatively, the effect of agency on credit assignment need not be

376 limited to learning, but, rather, could work at the level of memory retrieval through a  
377 comparator mechanism (Denniston et al., 2001; Stout & Miller, 2007).

378         The current findings have far-reaching implications both for normal functioning and  
379 mental health. In pedagogical settings, where massed instruction has been long shown  
380 to be detrimental (Ebbinghaus, 1885; Grote, 1995; Seabrook et al., 2005; Rohrer, &  
381 Taylor, 2006; Moulton et al., 2006; Patocka et al., 2019; Namaziandost et al., 2020), our  
382 findings raise the possibility that agency over the presentation of information might  
383 promote more selective, discriminating encoding and retention. In the context of mental  
384 health, it might open opportunities for therapeutical interventions based on enhancing the  
385 individual's perceived sense of agency in disorders characterized by attenuated selective  
386 learning, including psychotic (Jones et al., 1992; Moran et al., 2003; Fletcher & Frith,  
387 2009), attentional (Oades & Müller, 1997), anxiety (Boddez et al., 2012), and substance  
388 use disorders (SUDs) (Freeman et al., 2013; Muscat et al., 2008; Muscat & Spiteri, 2011).

389         For the present, much work is needed to elucidate the complex role that agency is  
390 likely to play in learning and psychopathology. Consider the case of SUDs, where agency  
391 is known to mitigate some of the more dramatic and aversive effects of drugs of abuse  
392 (Twining et al., 2009; Weise-Kelly & Siegel, 2001; Dworkin et al., 1995). This role might  
393 in part result from credit assignment being more competitive, which should prevent  
394 incidental and redundant stimuli from contributing to cue reactivity. Our results suggest  
395 that as the sense of agency over drug consumption wanes and drug-related behaviors  
396 transition from voluntary and goal-directed to habitual and compulsive (Everitt & Robbins,  
397 2005; 2016), credit assignment might also become less competitive. This transition would  
398 exacerbate the individual's vulnerability to drug abuse and relapse by drastically

399 expanding the set of stimuli capable of inducing cue reactivity. Tantalizingly, long-term  
400 exposure to potent rewards such as cocaine, heroin, and sucrose has been shown to  
401 impair competitive credit assignment (Lucantonio et al., 2015; Sharpe et al., 2015). In  
402 light of such implications, the present findings call for a closer investigation of the role of  
403 agency in credit assignment.

404

405

## Materials and Methods

406 For the sake of convenience, the four studies above will be referred to in this section as  
407 Exps. 1-4, and correspond, respectively, to the blocking task (Fig.1), the novel cue-  
408 competition task (Fig. 2), its second variant (Fig. 3), and the patterning task (Fig. 4).

409

### Subjects

411 All studies used 16 experimentally-naïve, gender-balanced, adult Long-Evans rats,  
412 making a total of 64 animals. The age and weights of the rats at the outset of each  
413 experiment was as follows. In Exp. 1, rats were ~20 weeks old (wo) and weighed 441-  
414 516 g (males) and 257-290 g (females); in Exp. 2, rats were ~13 wo and weighed 342-  
415 388 g (males) and 234-269 g (females); in Exp. 3, rats were ~20 wo and weighed 448-  
416 529 g (males) and 269-298 g (females); in Exp. 4, rats were ~22 wo and weighed 475-  
417 554 g (males) and 284-325 g (females). All animals were bred at Brooklyn College from  
418 commercially available populations (Charles River Laboratories). They were housed  
419 individually in standard clear-plastic tubs (10.5 in. × 19 in. × 8 in, Charles River  
420 Laboratories) with woodchip bedding. The colony room was maintained on a 14:10  
421 light/dark cycle schedule. Behavioral sessions were conducted between 7-10 hours after

422 the onset of the light phase of the cycle. Throughout training, water access was restricted  
423 to 1 h/day following each experimental session while food was provided *ad libitum*. All  
424 animal care and experimental procedures were conducted according to the National  
425 Institutes of Health's *Guide for the Care and the Use of Laboratory Animals*, and approved  
426 by the Brooklyn College Institutional Animal Care and Use Committee (Protocol #303).

427

## 428 **Apparatus**

429 Behavioral training was conducted in eight modular conditioning chambers (32-cm long  
430 X 25-cm wide X 33-cm tall, Med Associates, Inc.). Each chamber was enclosed in a  
431 ventilated sound-attenuating cubicle (74 cm x 45 cm x 60 cm) fitted with an exhaust fan  
432 that provided a background noise level of ~50 dB. All reported locations of stimulus and  
433 response apparatus were measured from the grid floor of the conditioning chamber to the  
434 lowest point or edge of the apparatus. The left wall of the chamber housed two white jewel  
435 lamps (28V DC, 100 mA) mounted on the left and right panels 9.3 cm from the grid floor.  
436 Above each of these lamps was a speaker located 20.6 cm above the grid floor and  
437 connected to a dedicated tone generator capable of delivering a 2.5-Hz, 80-dB clicker  
438 (left panel) and a 70-dB white noise (right panel). Two additional speakers were located  
439 on the left and right panels of the right wall of the chamber 24.8 cm above the grid floor.  
440 Each of them was also connected to a dedicated speaker capable of delivering a 12-kHz,  
441 70-dB tone (left panel) and a 1-kHz, 80-dB tone (right panel). The right wall also housed  
442 a third jewel lamp located on the center panel 17.2 cm above the grid floor. Below this  
443 lamp, 4.6 cm above the grid floor, was a circular noseport 2.6 cm in diameter, equipped  
444 with a yellow LED light and an infrared sensor for detecting nose entries. This noseport

445 was flanked by a recessed liquid reward magazine (aperture: 5.1 cm x 15.2 cm) located  
446 on the right panel, 1.6 cm above the grid floor. This magazine was equipped with an  
447 infrared sensor for detecting head entries, and connected to a liquid dipper that could  
448 deliver a 0.04 cc droplet of a 10% sucrose solution. The chambers remained dark  
449 throughout the experimental session except during presentations of the visual stimuli. In  
450 the same room was a computer running Med PC IV software (Med Associates Inc., St.  
451 Albans, VT, USA) on Windows OS which controlled and automatically recorded all  
452 experimental events via a Fader Control Interface.

453

## 454 **Procedure**

### 455 *Magazine training*

456 Prior to the beginning of each study, rats were first randomly assigned to either the master  
457 or yoked group—labeled groups Agency and Passive, respectively—with the constraint  
458 that each group be gender-balanced. Each animal assigned to the Agency group was  
459 paired with an age and sex-matched Passive group animal. All sessions began with a 2-  
460 min acclimation period in the conditioning chambers. Rats initially received a session of  
461 magazine training in which they learned to retrieve a sucrose reward from the dipper cup.  
462 This session lasted 62 min and consisted of 60 trials. For the first 10 trials, sucrose was  
463 made available for 30 s every 30 s; for the second 20 trials, it was available for 20 s every  
464 40 s; and for the last 30 trials, it was available for 10 s every 50 s.

465

### 466 *Shaping*

467 In all four studies, Agency rats went on to receive five shaping sessions in which they  
468 learned to self-initiate trials, following the procedure developed by Reverte et al. (2020).  
469 On the first shaping session, the noseport light was turned on for a maximum of 20 s,  
470 during which a nose poke at the nose port immediately resulted in the termination of the  
471 noseport light and a 10-s period of sucrose availability. Trials were separated by a 10 s  
472 variable ITI (range: 5–15 s). Failure to respond at the nose port resulted in the noseport  
473 light coming off and the trial being repeated after a regular ITI. Over the following four  
474 shaping sessions, we introduced and progressively increased a delay of 2, 4, 6, and 8 s  
475 between the rat's response at the port and sucrose availability. During this delay, the  
476 noseport light would flash at a 1-Hz frequency (on for 0.5 s, off for 0.5 s). Concurrently,  
477 reward availability was progressively shortened (8, 6, 4, and 3 s). Throughout shaping  
478 training (and for the remainder of the experiment), Passive were yoked to their Agency  
479 counterparts to ensure that they received the same exact sequence of events and at the  
480 same time, except, of course, for the trial-initiation response.

481

#### 482 *Trial structure*

483 The trial structure was common to all four studies (Panel A, Fig. 1). Following shaping,  
484 experimental sessions began with a 30-s acclimation period. Agency rats would then be  
485 presented with their first opportunity to start a trial as signaled by trial-availability cue (the  
486 onset of the noseport light). The duration of this cue was 20 s, during which a response  
487 at the noseport would immediately turn off the noseport light and turn on one of various  
488 possible visual, auditory, or audiovisual compound cues which were always 10 s long.  
489 The trial types specified by these cues were selected from a pseudorandom list built with

490 the constraint that no trial type could be presented more than three times in succession.  
491 On reinforced trials, the cues' offset coincided with the delivery of a 0.04-cc bolus of  
492 sucrose, which remained available for 3 s, after which a short ITI followed (mean: 10 s;  
493 range: 5-15 s). As during shaping, failure to self-initiate a trial terminated the noseport  
494 light after 20 s and led to a regular ITI period (mean: 10 s; range: 5-15 s). Passive rats  
495 received the same sequence of events—including the same trial types at the same time  
496 and in the same order—as their Agency counterparts, but in standard Pavlovian fashion  
497 (i.e., noncontingent on any response). For any yoked pair of rats, a session terminated  
498 once the Agency rat completed all scheduled trials or timed out after 90 min.

499         Since Agency rats self-paced their training, they could take breaks that elongated  
500 the effective average ITI. Such pauses were of course also applied to their yoked  
501 counterparts. Supplementary Table S1 provides the effective ITI durations as well as the  
502 total session durations for each experiment. Furthermore, granting agency over trial  
503 presentation necessarily entailed the risk that rats would not complete all scheduled trials  
504 within the imposed time limit of 90 min, in which case the session would time out. Once  
505 again, the use of a master-yoked procedure ensured that this issue affected both groups  
506 equally. Supplementary Table S2 lists all incomplete sessions for all studies presented.

507

### 508 *Discrimination training*

#### 509 Experiment 1

510 Training comprised two phases (see table in Panel B, Fig. 1). In the first, pretraining  
511 phase, rats in both groups received 14 sessions of A(1) vs. B(0) discrimination training,  
512 where A and B were visual cues and the numbers in parenthesis represent the probability



513 of reward. One visual cue was constructed by flashing the two jewel lamps on the left wall  
514 alternately at a 2-Hz frequency (on for 0.25 s, off for 0.25 s), whereas the other was  
515 provided by the steady illumination of the white jewel lamp located on the right wall. These  
516 cues were counterbalanced, and were presented 48 times each in a session.

517 The second, compound phase comprised 20 sessions, during which rats continued  
518 to receive A(1), B(0) trials presented 36 times each per session. In addition, compound  
519 trials AX(1) and BY(1) trials were introduced, where X and Y represent two auditory cues.  
520 These auditory cues were provided by a 12-kHz, 70-dB tone and a 70-dB white noise,  
521 counterbalanced. There were 12 presentations of each of the AX and BY compounds per  
522 session. From session 9 to the end of the compound phase, two probe trials with each of  
523 the target cues, X (i.e., the cue to be blocked) and Y (the control cue) were additionally  
524 administered. This increased the total number of trials in Phase 2 from 96 to 100.

525

## 526 Experiment 2

527 Training consisted of two phases (see table in Panel A, Fig. 2). In the first, pretraining  
528 phase, rats received 10 sessions of A(1) vs. B(0) and X(.75) vs. Y(.25) discrimination  
529 training, where A and B were the same visual cues and X and Y were the same auditory  
530 cues used in Exp. 1, also counterbalanced. Once again, the numbers in parenthesis  
531 indicate the probability of reward. Each cue was presented 24 times in a session.

532 In the second, compound phase, the probability of reward for each cue trained in  
533 Phase 1 was maintained constant, but cue A was added to all trials in which X was  
534 reinforced, whereas B was added to all trials in which Y was not reinforced. Thus, the  
535 compound phase consisted of the following trial types: 10A(1), 10B(0), 30AX(1), 10X(0),

536 30BY(0), 10Y(1), where the coefficients represent the number of trials presented in a  
537 session (100 trials in total). Phase-2 training proceeded for 20 sessions.

538

### 539 Experiment 3

540 The study comprised two phases (see table in Panel A, Fig. 3). In the pretraining phase,  
541 rats received 8 sessions of A(1) vs. B(0) discrimination training, where A and B were the  
542 same visual cues used in Exp. 1. Each of these trial types was presented 48 times in a  
543 session.

544 In the second, compound phase, rats received 32 sessions of discrimination  
545 training. During this phase, A(1) vs. B(0) training continued, but audiovisual compounds  
546 AX(.75) and BY(.25) were added, with X and Y being the same auditory stimuli used in  
547 Exp. 1. Specifically, the compound phase consisted of the following training trials: 24A(1),  
548 24B(0), 18AX(1), 6AX(0), 6BY(1), 18BY(0), where the coefficients denote the number of  
549 trials presented in a session. Starting on session 13, two probe trials with cues X and Y  
550 were interleaved with training trials on every session, raising the total number of trials per  
551 session from 96 to 100.

552

### 553 Experiment 4

554 Rats received a single phase of training consisting of 42 sessions with two concurrently  
555 trained nonlinear discrimination problems. One of these problems was an A(1), X(1),  
556 AX(0) negative-patterning discrimination, whereas the other was a B(0), Y(0), BY(1)  
557 positive-patterning discrimination. Cues A and B were the same visual cues, and X and

558 Y were the same auditory cues used in the previous experiments, counterbalanced within  
559 modality. All trial types were presented 16 times in a session, making a total of 96 trials.

560

### 561 *Behavioral Measures and Statistical analysis*

562 Conditioned responding was measured in both groups as the number of head entries in  
563 the sucrose magazine during the last 5-s of the 10-s cues. Focusing the analysis on the  
564 latter half of the cue has two advantages. First, it provides a cleaner measure of goal-  
565 tracking behavior, as sign-tracking behavior—which we did not measure, and which may  
566 have differed between the groups—tends to concentrate in the first half of a 10-s cue  
567 (Holland, 1977). Second, it filters out any bias in conditioned behavior resulting from the  
568 fact that Agency and Passive rats began their trials at different locations relative to the  
569 sucrose magazine. Indeed, whereas Agency rats necessarily had their snouts in the  
570 adjacent nose port at the time of cue onset, Passive rats were free to roam in the chamber  
571 and approach the magazine at all times, compromising any between-group comparison  
572 at the start of the cue period.

573 For analysis purposes, the data from each rat was first averaged across trials in a  
574 session and further collapsed into average responding across session blocks. Testing  
575 and training trial types were analyzed separately due to the high number of trial types and  
576 the unequal number of presentations per trial type. A linear mixed-model analysis of  
577 variance was used for all data analyses and subsequent post hoc analysis were  
578 performed with Bonferroni-corrected significance values. All analyses were conducted in  
579 JAMOVI (Gallucci, 2017; The Jamovi Project, 2019).

580

581 **Acknowledgements**

582 This research was supported by National Institute on Drug Abuse grants 5R00DA036561  
583 and 1R15DA051795 (GE). We thank Geoffrey Schoenbaum for his comments on a  
584 previous version of the MS. The authors declare that they do not have any conflicts of  
585 interest (financial or otherwise) related to the data presented in this manuscript. All  
586 correspondence to be addressed to Guillem R. Esber ([gesber@brooklyn.cuny.edu](mailto:gesber@brooklyn.cuny.edu)).

587

588 **Author contributions**

589 Mihwa Kang: Methodology, Software, Investigation, Data curation, Visualization, Formal  
590 analysis, Writing- Original draft preparation; Ingrid Reverte: Conceptualization,  
591 Validation, Methodology, Software, Investigation, Data curation, Formal analysis;  
592 Stephen Volz: Methodology, Formal analysis, Visualization, Writing- Original draft  
593 preparation; Keith Kaufman: Data curation, Visualization; Formal analysis; Salvatore  
594 Fevole: Data curation, Visualization; Formal analysis; Anna Matarazzo: Data curation,  
595 Visualization; Formal analysis; Fahd Alhazmi: Software; Inmaculada Marquez:  
596 Software, Visualization; Mihaela D. Iordanova: Conceptualization, Writing- Original draft  
597 preparation, Writing- Reviewing and Editing; Guillem R. Esber: Conceptualization,  
598 Project Administration, Methodology, Supervision, Writing- Original draft preparation,  
599 Writing- Reviewing and Editing, Funding acquisition.

600

601 **Author ORCIDs**

602 Guillem R. Esber: <https://orcid.org/0000-0001-8874-4255>

603 Mihaela D. Iordanova: <https://orcid.org/0000-0001-6232-448X>

604 Ingrid Reverte: <https://orcid.org/0000-0002-4120-9324>

605

606

## 607 **Ethics**

608 Animal experimentation: All animal care and experimental procedures were conducted

609 according to the National Institutes of Health's *Guide for the Care and the Use of*

610 *Laboratory Animals*, and approved by the Brooklyn College Institutional Animal Care

611 and Use Committee (Protocol #303).

612

## 613 **References**

614 Barela, P. B. (1999). Theoretical mechanisms underlying the trial-spacing effect in

615 Pavlovian fear conditioning. *Journal of Experimental Psychology: Animal*

616 *Behavior Processes*, 25(2), 177. <https://doi.org/10.1037/0097-7403.25.2.177>

617 Batsell Jr, W. R., & Batson, J. D. (1999). Augmentation of taste conditioning by a

618 preconditioned odor. *Journal of Experimental Psychology: Animal Behavior*

619 *Processes*, 25(3), 374. <https://doi.org/10.1037/0097-7403.25.3.374>

620 Beauchamp, A. J., Gluck, J. P., Fouty, H. E., & Lewis, M. H. (1991). Associative

621 processes in differentially reared rhesus monkeys (*Macaca mulatta*):

622 Blocking. *Developmental Psychobiology: The Journal of the International Society*

623 *for Developmental Psychobiology*, 24(3), 175-189.

624 <https://doi.org/10.1002/dev.420240304>

625 Beesley, T., & Shanks, D. R. (2012). Investigating cue competition in contextual cuing of

626 visual search. *Journal of Experimental Psychology: Learning, Memory, and*

627 *Cognition*, 38(3), 709. <https://doi.org/10.1037/a0024885>

- 628 Blaser, R. E., Couvillon, P. A., & Bitterman, M. E. (2006). Blocking and pseudoblocking:  
629 New control experiments with honeybees. *Quarterly Journal of Experimental*  
630 *Psychology*, 59(1), 68-76. <https://doi.org/10.1080/17470210500242938>
- 631 Boddez, Y., Vervliet, B., Baeyens, F., Lauwers, S., Hermans, D., & Beckers, T. (2012).  
632 Expectancy bias in a selective conditioning procedure: Trait anxiety increases the  
633 threat value of a blocked stimulus. *Journal of behavior therapy and experimental*  
634 *psychiatry*, 43(2), 832-837. <https://doi.org/10.1016/j.jbtep.2011.11.005>
- 635 Brandon, S. E., Vogel, E. H., & Wagner, A. R. (2000). A componential view of configural  
636 cues in generalization and discrimination in Pavlovian conditioning. *Behavioural*  
637 *Brain Research*, 110(1-2), 67-72. [https://doi.org/10.1016/S0166-4328\(99\)00185-](https://doi.org/10.1016/S0166-4328(99)00185-0)  
638 0
- 639 Bush, R. R., & Mosteller, F. (1951). A model for stimulus generalization and  
640 discrimination. *Psychological Review*, 58, 413–423.  
641 <https://doi.org/10.1037/h0054576>
- 642 Byrom, N. C., & Murphy, R. A. (2018). Cue competition influences biconditional  
643 discrimination. *Quarterly Journal of Experimental Psychology*, 72(2), 182–192.  
644 <https://doi.org/10.1080/17470218.2017.1363256>
- 645 Chorazyna, H. (1962). Some properties of conditioned inhibition. *Acta Biologicae*  
646 *Experimentalis*, 22, 5–13. PMID: 13879175
- 647 de Bruin, L., & Michael, J. (2017). Prediction error minimization: Implications for  
648 Embodied Cognition and the Extended Mind Hypothesis. *Brain and Cognition*,  
649 112, 58–63. <https://doi.org/10.1016/j.bandc.2016.01.009>

- 650 Delamater, A. R. (2012). On the nature of CS and US representations in Pavlovian  
651 learning. *Learning & Behavior*, *40*(1), 1-23. <https://doi.org/10.3758/s13420-011->  
652 0036-4
- 653 den Ouden, H. E., Kok, P., & de Lange, F. P. (2012). How prediction errors shape  
654 perception, attention, and motivation. *Frontiers in Psychology*, *3*, 548.  
655 <https://doi.org/10.3389/fpsyg.2012.00548>
- 656 Denniston, J. C., Savastano, H. I., & Miller, R. R. (2001). The extended comparator  
657 hypothesis: Learning by contiguity, responding by relative strength. *Handbook of*  
658 *Contemporary Learning Theories*, *3*, 65-117.
- 659 Dickinson, A. (1980). *Contemporary animal learning Theories*. Cambridge: Cambridge  
660 University Press.
- 661 Dickinson, A., Shanks, D., & Evenden, J. (1984). Judgement of act-outcome  
662 contingency: The role of selective attribution. *The Quarterly Journal of*  
663 *Experimental Psychology*, *36*(1), 29-50.  
664 <https://doi.org/10.1080/14640748408401502>
- 665 Diederer, K. M. J., & Fletcher, P. C. (2020). Dopamine, Prediction Error and Beyond.  
666 *The Neuroscientist*, *27*(1), 30–46. <https://doi.org/10.1177/1073858420907591>
- 667 Durlach, P. J., & Rescorla, R. A. (1980). Potentiation rather than overshadowing in  
668 flavor-aversion learning: an analysis in terms of within-compound  
669 associations. *Journal of Experimental Psychology: Animal Behavior*  
670 *Processes*, *6*(2), 175. <https://doi.org/10.1037/0097-7403.6.2.175>
- 671 Dworkin, S. I., Mirkis, S., & Smith, J. E. (1995). Response-dependent versus response-  
672 independent presentation of cocaine: differences in the lethal effects of the

- 673 drug. *Psychopharmacology*, 117(3), 262-266.
- 674 <https://doi.org/10.1007/BF02246100>
- 675 Ebbinghaus, H. (1885). *Über das Gedächtnis: Untersuchungen zur experimentellen*  
676 *Psychologie*. Duncker & Humblot.
- 677 Esber, G. R., & Haselgrove, M. (2011). Reconciling the influence of predictiveness and  
678 uncertainty on stimulus salience: a model of attention in associative  
679 learning. *Proceedings of the Royal Society B: Biological Sciences*, 278(1718),  
680 2553-2561. <https://doi.org/10.1098/rspb.2011.0836>
- 681 Everitt, B. J., & Robbins, T. W. (2005). Neural systems of reinforcement for drug  
682 addiction: from actions to habits to compulsion. *Nature Neuroscience*, 8(11),  
683 1481-1489. <https://doi.org/10.1038/nn1579>
- 684 Everitt, B. J., & Robbins, T. W. (2016). Drug addiction: updating actions to habits to  
685 compulsions ten years on. *Annual Review of Psychology*, 67, 23-50.  
686 <https://doi.org/10.1146/annurev-psych-122414-033457>
- 687 Fisher, K. A., Tenforde, M. W., Feldstein, L. R., Lindsell, C. J., Shapiro, N. I., Files, D.  
688 C., Gibbs, K. W., Erickson, H. L., Prekker, M. E., Steingrub, J. S., Exline, M. C.,  
689 Henning, D. J., Wilson, J. G., Brown, S. M., Peltan, I. D., Rice, T. W., Hager, D.  
690 N., Ginde, A. A., Talbot, H. K., Casey, J. D., ... CDC COVID-19 Response Team  
691 (2020). Community and Close Contact Exposures Associated with COVID-19  
692 Among Symptomatic Adults  $\geq 18$  Years in 11 Outpatient Health Care Facilities -  
693 United States, July 2020. *MMWR. Morbidity and mortality weekly report*, 69(36),  
694 1258–1264. <https://doi.org/10.15585/mmwr.mm6936a5>



- 695 Fletcher, P. C., & Frith, C. D. (2009). Perceiving is believing: a Bayesian approach to  
696 explaining the positive symptoms of schizophrenia. *Nature Reviews*  
697 *Neuroscience*, 10(1), 48-58. <https://doi.org/10.1038/nrn2536>
- 698 Freeman, T. P., Morgan, C. J., Pepper, F., Howes, O. D., Stone, J. M., & Curran, H. V.  
699 (2013). Associative blocking to reward-predicting cues is attenuated in ketamine  
700 users but can be modulated by images associated with drug  
701 use. *Psychopharmacology*, 225(1), 41-50. [https://doi.org/10.1007/s00213-012-](https://doi.org/10.1007/s00213-012-2791-0)  
702 2791-0
- 703 Gallucci, M. (2017). *GAMLj*. Retrieved from <https://github.com/mcfanda/gamlj>
- 704 George, D. N., & Pearce, J. M. (2012). A configural theory of attention and associative  
705 learning. *Learning & Behavior*, 40(3), 241-254. [https://doi.org/10.3758/s13420-](https://doi.org/10.3758/s13420-012-0078-2)  
706 012-0078-2
- 707 Gradin, V. B., Kumar, P., Waiter, G., Ahearn, T., Stickle, C., Milders, M., Reid, I., Hall,  
708 J., & Steele, J. D. (2011). Expected value and prediction error abnormalities in  
709 depression and schizophrenia. *Brain*, 134(6), 1751–1764.  
710 <https://doi.org/10.1093/brain/awr059>
- 711 Grote, M. G. (1995). Distributed versus massed practice in high school physics. *School*  
712 *Science and Mathematics*, 95(2), 97-101. [https://doi.org/10.1111/j.1949-](https://doi.org/10.1111/j.1949-8594.1995.tb15736.x)  
713 8594.1995.tb15736.x
- 714 Harris, J. A. (2006). Elemental representations of stimuli in associative  
715 learning. *Psychological Review*, 113(3), 584. [https://doi.org/10.1037/0033-](https://doi.org/10.1037/0033-295X.113.3.584)  
716 295X.113.3.584

- 717 Holland, P. C. (1977). Conditioned stimulus as a determinant of the form of the  
718 Pavlovian conditioned response. *Journal of Experimental Psychology: Animal*  
719 *Behavior Processes*, 3(1), 77. <https://doi.org/10.1037/0097-7403.3.1.77>
- 720 Holland, P. C. (2000). Trial and intertrial durations in appetitive conditioning in  
721 rats. *Animal Learning & Behavior*, 28(2), 121-135.  
722 <https://doi.org/10.3758/BF03200248>
- 723 Honey, R. C., Dwyer, D. M., & Iliescu, A. F. (2020). HeiDI: A model for Pavlovian  
724 learning and performance with reciprocal associations. *Psychological*  
725 *Review*, 127(5), 829. <https://doi.org/10.1037/rev0000196>
- 726 Jones, S. H., Gray, J. A. & Hemsley, D. R. (1992). Loss of the Kamin blocking effect in  
727 acute but not chronic schizophrenics. *Biol. Psychiatry*, 32, 739–755.  
728 [https://doi.org/10.1016/0006-3223\(92\)90078-E](https://doi.org/10.1016/0006-3223(92)90078-E)
- 729 Kamin, L. J. (1968). “Attention-like” processes in classical conditioning. In M. R. Jones  
730 (ed), *Miami Symposium on the prediction of behavior: aversive stimulation*, (pp.  
731 9–33). Miami: University of Miami Press.
- 732 Wagner, A. R. (1969). Stimulus validity and stimulus selection in associative learning. In  
733 N. J. Mackintosh, & W. K. Honig, (Eds.), *Fundamental issues in associative*  
734 *learning* (pp. 90-122). Halifax, Canada: Dalhousie University Press.
- 735 Krause, N. M., Freiling, I., Beets, B., & Brossard, D. (2020). Fact-checking as risk  
736 communication: the multi-layered risk of misinformation in times of COVID-19.  
737 *Journal of Risk Research*, 23(7–8), 1052–1059.  
738 <https://doi.org/10.1080/13669877.2020.1756385>

- 739 Krawczyk, M. C., Fernández, R. S., Pedreira, M. E., & Boccia, M. M. (2017). Toward a  
740 better understanding on the role of prediction error on memory processes: From  
741 bench to clinic. *Neurobiology of Learning and Memory*, *142*, 13–20.  
742 <https://doi.org/10.1016/j.nlm.2016.12.011>
- 743 Kruschke, J. K. (2001). Toward a unified model of attention in associative  
744 learning. *Journal of Mathematical Psychology*, *45*(6), 812-863.  
745 <https://doi.org/10.1006/jmps.2000.1354>
- 746 Lattal, K. M. (1999). Trial and intertrial durations in Pavlovian conditioning: issues of  
747 learning and performance. *Journal of Experimental Psychology: Animal Behavior*  
748 *Processes*, *25*(4), 433. <https://doi.org/10.1037/0097-7403.25.4.433>
- 749 Le Pelley, M. E. (2004). The role of associative history in models of associative learning:  
750 A selective review and a hybrid model. *The Quarterly Journal of Experimental*  
751 *Psychology Section B*, *57*(3b), 193-243.  
752 <https://doi.org/10.1080/02724990344000141>
- 753 Lucantonio, F., Kambhampati, S., Haney, R. Z., Atalayer, D., Rowland, N. E., Shaham,  
754 Y., & Schoenbaum, G. (2015). Effects of Prior Cocaine Versus Morphine or  
755 Heroin Self-Administration on Extinction Learning Driven by Overexpectation  
756 Versus Omission of Reward. *Biological Psychiatry*, *77*(10), 912–920.  
757 <https://doi.org/10.1016/j.biopsych.2014.11.017>
- 758 Ludvig, E. A., Sutton, R. S., & Kehoe, E. J. (2012). Evaluating the TD model of classical  
759 conditioning. *Learning & Behavior*, *40*(3), 305-319.  
760 <https://doi.org/10.3758/s13420-012-0082-6>

- 761 Mackintosh, N. J. (1974). *The psychology of animal learning*. San Diego, CA: Academic  
762 Press.
- 763 Mackintosh, N. J. (1975). A theory of attention: Variations in the associability of stimuli  
764 with reinforcement. *Psychological Review*, 82(4), 276.  
765 <https://doi.org/10.1037/h0076778>
- 766 Maes, E., Boddez, Y., Alfei, J. M., Kryptos, A. M., D'Hooge, R., De Houwer, J., &  
767 Beckers, T. (2016). The elusive nature of the blocking effect: 15 failures to  
768 replicate. *Journal of Experimental Psychology: General*, 145(9), e49–  
769 e71. <https://doi.org/10.1037/xge0000200>
- 770 McLaren, I. P. L., & Mackintosh, N. J. (2000). An elemental model of associative  
771 learning: I. Latent inhibition and perceptual learning. *Animal Learning &  
772 Behavior*, 28(3), 211-246. <https://doi.org/10.3758/BF03200258>
- 773 Merritt, D. M., Melkis, J. G., Kwok, B., Tran, C., & van der Kooy, D. (2019). Analysis of  
774 Mutants Suggests Kamin Blocking in *C. elegans* is Due to Interference with  
775 Memory Recall Rather than Storage. *Scientific Reports*, 9(1), 1-8.  
776 <https://doi.org/10.1038/s41598-019-38939-3>
- 777 Miller, R. R., & Matzel, L. D. (1988). The comparator hypothesis: A response rule for the  
778 expression of associations. In *Psychology of Learning and Motivation* (Vol. 22,  
779 pp. 51-92). Academic Press. [https://doi.org/10.1016/S0079-7421\(08\)60038-9](https://doi.org/10.1016/S0079-7421(08)60038-9)
- 780 Miller, R. R., Barnet, R. C., & Grahame, N. J. (1995). Assessment of the Rescorla-  
781 Wagner model. *Psychological bulletin*, 117(3), 363. [https://doi.org/10.1037/0033-  
782 2909.117.3.363](https://doi.org/10.1037/0033-2909.117.3.363)

- 783 Moran, P. M., Al-Uzri, M. M., Watson, J., & Reveley, M. A. (2003). Reduced Kamin  
784 blocking in non paranoid schizophrenia: associations with schizotypy. *Journal of*  
785 *Psychiatric Research*, 37(2), 155-163. [https://doi.org/10.1016/S0022-](https://doi.org/10.1016/S0022-3956(02)00099-7)  
786 3956(02)00099-7
- 787 Moulton, C. A. E., Dubrowski, A., MacRae, H., Graham, B., Grober, E., & Reznick, R.  
788 (2006). Teaching surgical skills: what kind of practice makes perfect?: a  
789 randomized, controlled trial. *Annals of surgery*, 244(3), 400.  
790 <https://doi.org/10.1097/01.sla.0000234808.85789.6a>
- 791 Muscat, R., & Spiteri, R. (2011). Cognitive neuroscience of cocaine drug use (Master's  
792 thesis, University of Malta).
- 793 Muscat, R., Goodall, G., & Castillo, M. (2008). Heroin addiction and associative  
794 learning (Master's thesis, University of Malta).
- 795 Namaziandost, E., Sawalmeh, M. H. M., & Soltanabadi, M. I. (2020). The effects of  
796 spaced versus massed distribution instruction on EFL learners' vocabulary recall  
797 and retention. *Cogent Education*, 7(1), 1792261.  
798 <https://doi.org/10.1080/2331186X.2020.1792261>
- 799 Niv, Y., & Schoenbaum, G. (2008). Dialogues on prediction errors. *Trends in Cognitive*  
800 *Sciences*, 12(7), 265–272. <https://doi.org/10.1016/j.tics.2008.03.006>
- 801 Nowak, B. ł., Brzóška, P. ł., Piotrowski, J. ł., Sedikides, C., Żemojtel-Piotrowska, M., &  
802 Jonason, P. K. (2020). Adaptive and maladaptive behavior during the COVID-19  
803 pandemic: The roles of Dark Triad traits, collective narcissism, and health beliefs.  
804 *Personality and Individual Differences*, 167, 110232.  
805 <https://doi.org/10.1016/j.paid.2020.110232>

- 806 Oades, R. D., & Müller, B. (1997). The development of conditioned blocking and  
807 monoamine metabolism in children with attention-deficit-hyperactivity disorder or  
808 complex tics and healthy controls: an exploratory analysis. *Behavioural Brain*  
809 *Research*, 88(1), 95-102. [https://doi.org/10.1016/S0166-4328\(97\)02306-1](https://doi.org/10.1016/S0166-4328(97)02306-1)
- 810 Ohmae, S., & Medina, J. F. (2015). Climbing fibers encode a temporal-difference  
811 prediction error during cerebellar learning in mice. *Nature Neuroscience*, 18(12),  
812 1798–1803. <https://doi.org/10.1038/nn.4167>
- 813 Packheiser, J., Pusch, R., Stein, C. C., Güntürkün, O., Lachnit, H., & Uengoer, M.  
814 (2020). How competitive is cue competition? *Quarterly Journal of Experimental*  
815 *Psychology*, 73(1), 104-114. <https://doi.org/10.1177/1747021819866967>
- 816 Palmerino, C. C., Rusiniak, D. W., & Garcia, J. (1980). Flavor illness aversions: The  
817 peculiar roles of odor and taste in memory for poisons. *Science*, 208, 753–755.  
818 <https://doi.org/10.1126/science.7367891>
- 819 Patocka, C., Cheng, A., Sibbald, M., Duff, J. P., Lai, A., Lee-Nobbee, P., ... & Bhanji, F.  
820 (2019). A randomized education trial of spaced versus massed instruction to  
821 improve acquisition and retention of paediatric resuscitation skills in emergency  
822 medical service (EMS) providers. *Resuscitation*, 141, 73-80.  
823 <https://doi.org/10.1016/j.resuscitation.2019.06.010>
- 824 Pavlov, I. P. (1927). *Conditioned Reflexes*. Oxford: Oxford University Press.
- 825 Pearce, J. M. (1994). Similarity and discrimination: a selective review and a  
826 connectionist model. *Psychological Review*, 101(4), 587.  
827 <https://doi.org/10.1037/0033-295X.101.4.587>

- 828 Pearce, J. M., & Hall, G. (1980). A model for Pavlovian learning: variations in the  
829 effectiveness of conditioned but not of unconditioned stimuli. *Psychological*  
830 *Review*, 87(6), 532. <https://doi.org/10.1037/0033-295X.87.6.532>
- 831 Pearce, J. M., Dopson, J. C., Haselgrove, M., & Esber, G. R. (2012). The fate of  
832 redundant cues during blocking and a simple discrimination. *Journal of*  
833 *Experimental Psychology: Animal Behavior Processes*, 38(2), 167.  
834 <https://doi.org/10.1037/a0027662>
- 835 Prados, J., Alvarez, B., Howarth, J., Stewart, K., Gibson, C. L., Hutchinson, C. V., ... &  
836 Davidson, C. (2013). Cue competition effects in the planarian. *Animal*  
837 *cognition*, 16(2), 177-186. <https://doi.org/10.1007/s10071-012-0561-3>
- 838 Rescorla, R. A. (1968). Probability of shock in the presence and absence of CS in fear  
839 conditioning. *Journal of Comparative and Physiological Psychology*, 66(1),  
840 1. <https://doi.org/10.1037/h0025984>
- 841 Rescorla, R. A. (1970). Reduction in the effectiveness of reinforcement after prior  
842 excitatory conditioning. *Learning & Motivation*, 1, 327-381.  
843 [https://doi.org/10.1016/0023-9690\(70\)90101-3](https://doi.org/10.1016/0023-9690(70)90101-3)
- 844 Rescorla, R. A. (2003). Protection from extinction. *Animal Learning & Behavior*, 31(2),  
845 124–132. <https://doi.org/10.3758/bf03195975>
- 846 Rescorla, R. A., & Wagner, A. R. (1972). A Theory of Pavlovian Conditioning: Variations  
847 in the Effectiveness of Reinforcement and Nonreinforcement. In A. H. Black, &  
848 W. F. Prokasy (Eds.), *Classical Conditioning II: Current Research and Theory*,  
849 64-99. New York: Appleton-Century-Crofts.

- 850 Reverte, I., Volz, S., Alhazmi, F. H., Kang, M., Kaufman, K., Chan, S., Jou, C.,  
851 Iordanova, M.D., & Esber, G. R. (2020). A self-initiated cue-reward learning  
852 procedure for neural recording in rodents. *Journal of Neuroscience*  
853 *Methods*, 338, 108671. <https://doi.org/10.1016/j.jneumeth.2020.108671>
- 854 Roesch, M. R., Esber, G. R., Li, J., Daw, N. D., & Schoenbaum, G. (2012). Surprise!  
855 Neural correlates of Pearce-Hall and Rescorla-Wagner coexist within the brain.  
856 *European Journal of Neuroscience*, 35(7), 1190–1200.  
857 <https://doi.org/10.1111/j.1460-9568.2011.07986.x>
- 858 Rohrer, D., & Taylor, K. (2006). The effects of overlearning and distributed practise on  
859 the retention of mathematics knowledge. *Applied Cognitive Psychology: The*  
860 *Official Journal of the Society for Applied Research in Memory and*  
861 *Cognition*, 20(9), 1209-1224. <https://doi.org/10.1002/acp.1266>
- 862 Schmajuk, N. A. (2010). Computational models of conditioning. Cambridge, UK:  
863 Cambridge University Press.
- 864 Seabrook, R., Brown, G. D., & Solity, J. E. (2005). Distributed and massed practice:  
865 From laboratory to classroom. *Applied cognitive psychology*, 19(1), 107-122.  
866 <https://doi.org/10.1002/acp.1066>
- 867 Sharpe, M. J., Clemens, K. J., Morris, M. J., & Westbrook, R. F. (2015). Daily Exposure  
868 to Sucrose Impairs Subsequent Learning About Food Cues: A Role for  
869 Alterations in Ghrelin Signaling and Dopamine D2 Receptors.  
870 *Neuropsychopharmacology*, 41(5), 1357–1365.  
871 <https://doi.org/10.1038/npp.2015.287>



- 872 Siegel, S., & Allan, L. G. (1996). The widespread influence of the Rescorla-Wagner  
873 model. *Psychonomic Bulletin & Review*, 3(3), 314-321.  
874 <https://doi.org/10.3758/BF03210755>
- 875 Sissons, H. T., & Miller, R. R. (2009). Overexpectation and trial massing. *Journal of*  
876 *Experimental Psychology: Animal Behavior Processes*, 35(2), 186.  
877 <https://doi.org/10.1037/a0013426>
- 878 Stout, S. C., & Miller, R. R. (2007). Sometimes-competing retrieval (SOCR): A  
879 formalization of the comparator hypothesis. *Psychological Review*, 114(3), 759.  
880 <https://doi.org/10.1037/0033-295X.115.1>.
- 881 Stout, S. C., Chang, R., & Miller, R. R. (2003). Trial spacing is a determinant of cue  
882 interaction. *Journal of Experimental Psychology: Animal Behavior*  
883 *Processes*, 29(1), 23. <https://doi.org/10.1037/0033-295x.114.3.759>
- 884 Sunsay, C., & Bouton, M. E. (2008). Analysis of a trial-spacing effect with relatively long  
885 intertrial intervals. *Learning & Behavior*, 36(2), 104-115.  
886 <https://doi.org/10.3758/LB.36.2.104>
- 887 Sutton, R. S. & Barto, A. G. (1990). Time-derivative models of Pavlovian reinforcement.  
888 in M. Gabriel & J. Moore (Eds), *Learning and computational neuroscience:*  
889 *Foundations of adaptive networks* (pp. 497–537). MIT Press.
- 890 Sutton, R. S. (1988). Learning to predict by the methods of temporal differences.  
891 *Machine learning*, 3(1), 9–44. <https://doi.org/10.1023/A:1022633531479>
- 892 Sutton, R. S., & Barto, A. G. (2018). Reinforcement Learning, second edition: An  
893 Introduction (Adaptive Computation and Machine Learning series) (second  
894 edition). Bradford Books.

- 895 The Jamovi Project. (2019). jamovi. Retrieved from [www.jamovi.org](http://www.jamovi.org)
- 896 Tobler, P. N., O'Doherty, J. P., Dolan, R. J., & Schultz, W. (2006). Human neural  
897 learning depends on reward prediction errors in the blocking paradigm. *Journal of*  
898 *Neurophysiology*, 95(1), 301-310. <https://doi.org/10.1152/jn.00762.2005>
- 899 Twining, R. C., Bolan, M., & Grigson, P. S. (2009). Yoked delivery of cocaine is aversive  
900 and protects against the motivation for drug in rats. *Behavioral*  
901 *Neuroscience*, 123(4), 913. <https://doi.org/10.1037/a0016498>
- 902 Urcelay, G. P. (2017). Competition and facilitation in compound conditioning. *Journal of*  
903 *Experimental Psychology: Animal Learning and Cognition*, 43(4), 303.
- 904 Urcelay, G. P., & Miller, R. R. (2014). The functions of contexts in associative  
905 learning. *Behavioural Processes*, 104, 2-12. <https://doi.org/10.1037/a0016498>
- 906 Vadillo, M. A., & Matute, H. (2010). Augmentation in contingency learning under time  
907 pressure. *British Journal of Psychology*, 101(3), 579-589.  
908 <https://doi.org/10.1348/000712609X477566>
- 909 Waelti, P., Dickinson, A., & Schultz, W. (2001). Dopamine responses comply with basic  
910 assumptions of formal learning theory. *Nature*, 412(6842), 43–48.  
911 <https://doi.org/10.1038/35083500>
- 912 Wagner, A. R. (1969). Stimulus validity and stimulus selection in associative learning. In  
913 N. J. Mackintosh, & W. K. Honig (Eds.), *Fundamental issues in associative*  
914 *learning* (pp. 90-122). Halifax, Canada: Dalhousie University Press.
- 915 Wagner, A. R. (1981). SOP: A model of automatic memory processing in animal  
916 behavior. In N. E. Spear & R. R. Miller (Eds.), *Information Processing in Animals:*  
917 *Memory Mechanisms* (pp. 5-47). Hillsdale, NJ: Erlbaum.

- 918 Wagner, A. R. (2003). Context-sensitive elemental theory. *The Quarterly Journal of*  
919 *Experimental Psychology: Section B*, 56(1), 7-29.  
920 <https://doi.org/10.1080/02724990244000133>
- 921 Wagner, A. R., Logan, F. A., & Haberlandt, K. (1968). Stimulus selection in animal  
922 discrimination learning. *Journal of Experimental Psychology*, 76, 171–180.  
923 <https://doi.org/10.1037/h0025414>
- 924 Watabe-Uchida, M., Eshel, N., & Uchida, N. (2017). Neural Circuitry of Reward  
925 Prediction Error. *Annual Review of Neuroscience*, 40(1), 373–394.  
926 <https://doi.org/10.1146/annurev-neuro-072116-031109>
- 927 Weise-Kelly, L. & Siegel, S. (2001). Self-administration cues as signals: Drug self-  
928 administration and tolerance. *Journal of Experimental Psychology: Animal*  
929 *Behavior Processes*, 27(2), 125. <https://doi.org/10.1037/0097-7403.27.2.125>
- 930 Wheeler, D. S., & Miller, R. R. (2008). Determinants of cue interactions. *Behavioural*  
931 *Processes*, 78(2), 191-203.
- 932 Witnauer, J. E., Urcelay, G. P., & Miller, R. R. (2014). The error in total error  
933 reduction. *Neurobiology of Learning and Memory*, 108, 119-135.
- 934 Zald, D. H., & Treadway, M. T. (2017). Reward Processing, Neuroeconomics, and  
935 Psychopathology. *Annual Review of Clinical Psychology*, 13(1), 471–495.  
936 <https://doi.org/10.1146/annurev-clinpsy-032816-044957>  
937
